# Supplementary material for: Photo-responsive magnetic mesoporous silica nanocomposites for magnetic targeted cancer therapy
Source: Royal Society of Chemistry journal article supplement (doi:10.1039/c8nj06105j), 2019-01-01
Supplement: c8nj06105j1.pdf [file c8nj06105j1.pdf]

Electronic supplementary information (ESI)

**Photo-responsive magnetic mesoporous silica  
nanocomposites for the magnetic targeted cancer therapy**

Yitong Wang,<sup>a</sup> Ling Wang,<sup>a</sup> Luxuan Guo,<sup>a</sup> Maiomiao Yan,<sup>b</sup> Lei Feng,<sup>a</sup> Shuli Dong,<sup>a</sup>  
Jingcheng Hao<sup>a,\*</sup>

<sup>a</sup> *Key Laboratory of Colloid and Interface Chemistry & Key Laboratory of Special Aggregated Materials (Shandong University), Ministry of Education, Jinan 250100, P. R. China*

<sup>b</sup> *Department of Pharmacy, Binzhou Medical College, Yantai 264003, P. R. China*

\* Corresponding author. Tel: +86-531-88366074.  
E-mail: [jhao@sdu.edu.cn](mailto:jhao@sdu.edu.cn)

## Supplementary Figures

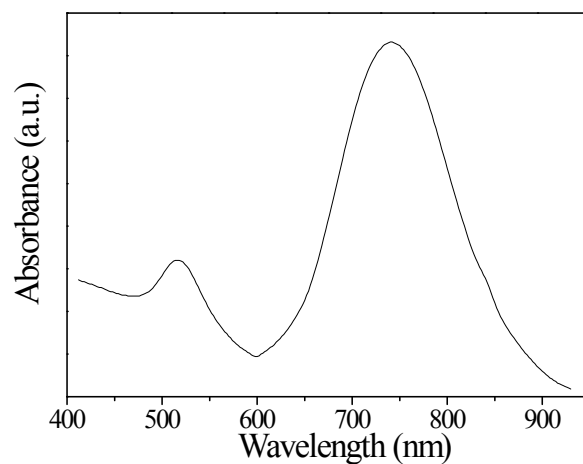

**Fig. S1** UV-vis spectra of Au NRs.

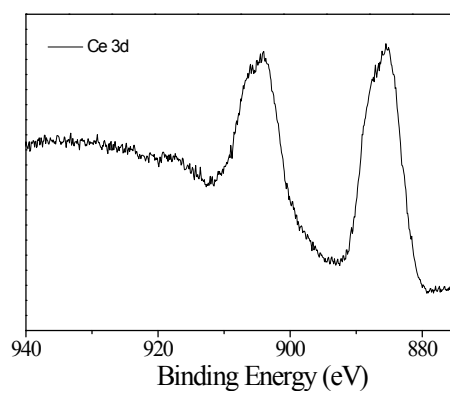

**Fig. S2** X-Ray photon spectroscopy (XPS) of Au@SiO<sub>2</sub>/Ce.

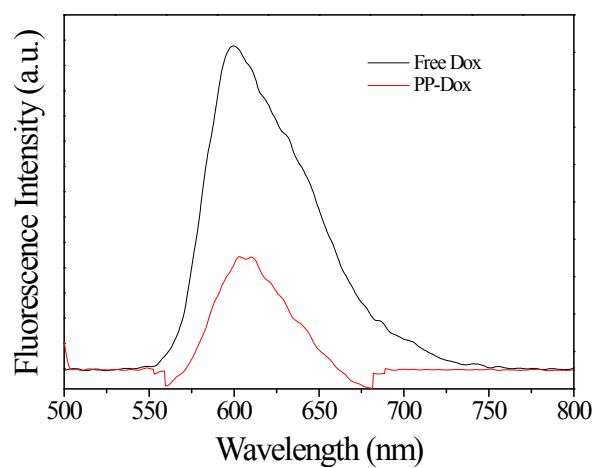

**Fig. S3** Fluorescence spectra of free DOX and PP-DOX nanocomposites in pH=7.4 aqueous solution.

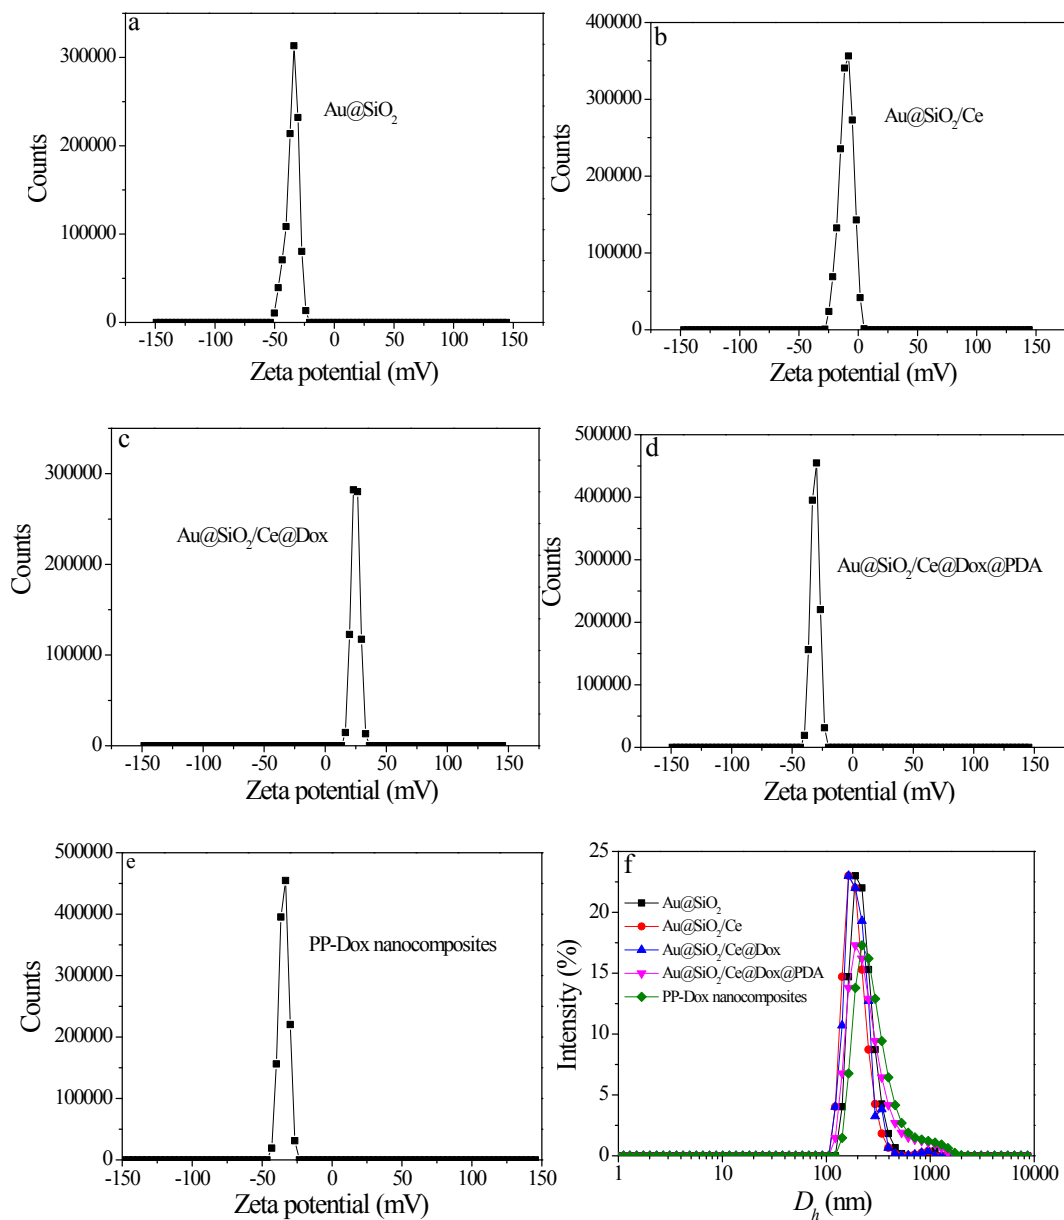

**Fig. S4** Zeta potential of (a) Au@SiO<sub>2</sub>, (b) Au@SiO<sub>2</sub>/Ce, (c) Au@SiO<sub>2</sub>/Ce@Dox, (d) Au@SiO<sub>2</sub>/Ce@Dox@PDA and (e) PP-Dox nanocomposites. (f) Average sizes of Au@SiO<sub>2</sub>, Au@SiO<sub>2</sub>/Ce, Au@SiO<sub>2</sub>/Ce@Dox, Au@SiO<sub>2</sub>/Ce@Dox@PDA and PP-Dox nanocomposites.

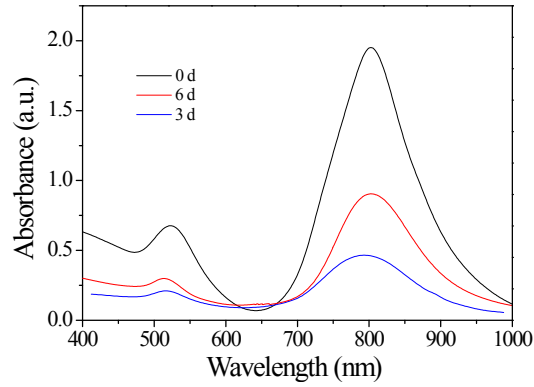

**Fig. S5** UV-vis spectra of PP-Dox with an external magnetic field.

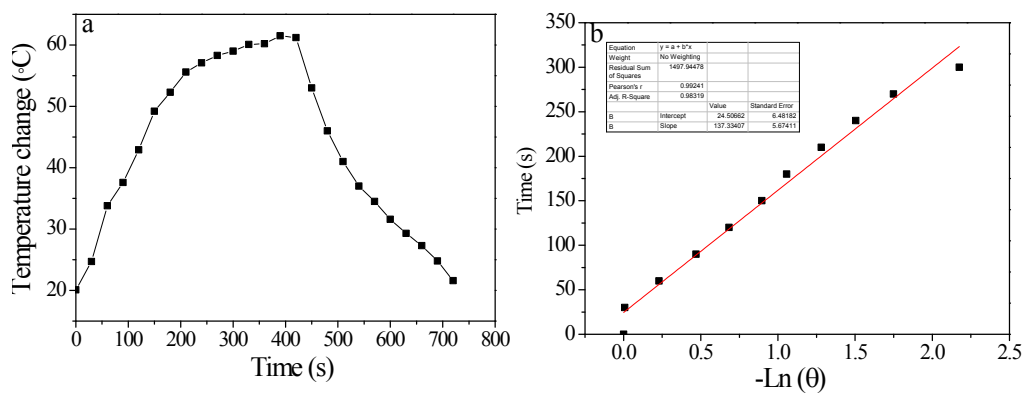

**Fig. S6** (a) Photothermal effect of the irradiation of PP-Dox in aqueous dispersion with the NIR laser, in which the irradiation lasted for 7 min. (b) Time constant for heat transfer from the system is determined to be  $\tau_s = 137.33$  s by applying the linear time data from the cooling period (after 720 s) versus negative natural logarithm of driving force temperature, which is obtained from the cooling stage of panel a.

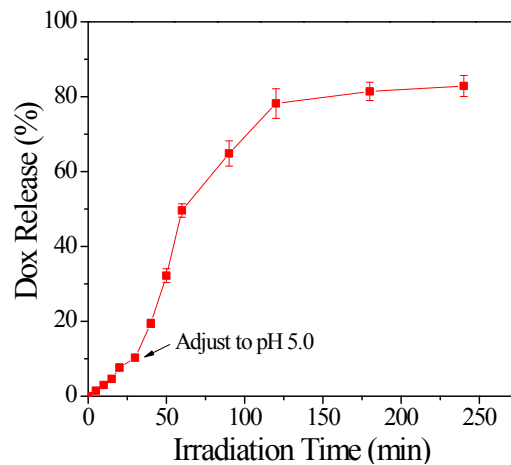

**Fig. S7** Stimuli-responsive Dox release profile triggered by acidity. The media pH is

7.4 within 30 min, and the media adjusted to 5.0 at 30 min point.

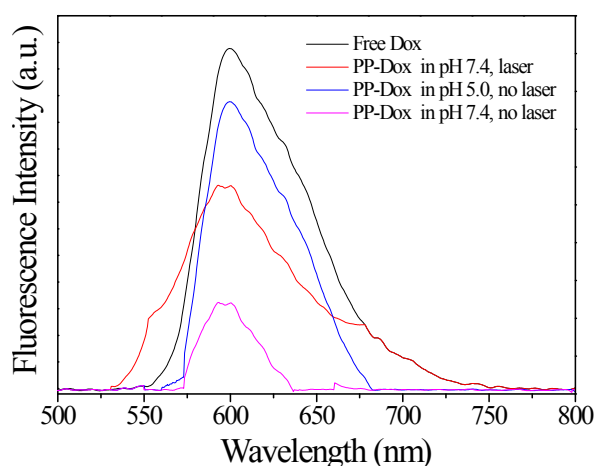

**Fig. S8** Fluorescence spectra of supernatants of the PP-Dox incubated in pH=5.0 or pH=7.4 aqueous solution for 35 h.

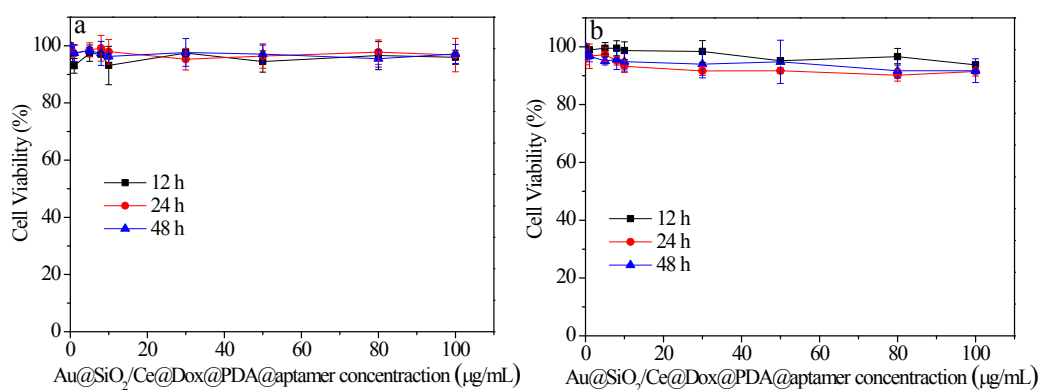

**Fig. S9** Cytotoxicity assays of (a) A549 cells and (b) HepG2 cells incubated with Au@SiO<sub>2</sub>/Ce@PDA@aptamer at different concentrations.

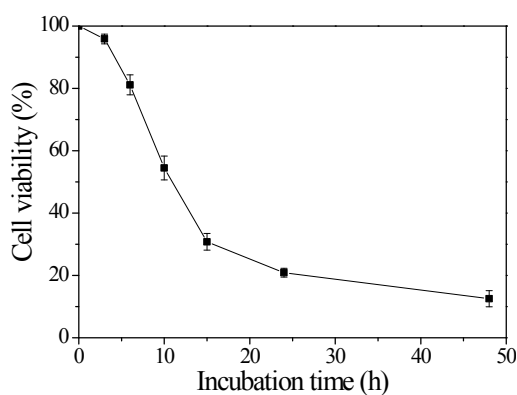

**Fig. 10** The relative cell viability of A549 cells incubated with PP-Dox nanocomposites + laser (The concentration of Dox in PP-Dox is 10 μM, 808 nm, 0.8

W/cm<sup>2</sup>, 10 min) for different incubation time. Error bars are standard error of the mean.
